# Supplementary material for: Ultrahigh-yield synthesis of N-doped carbon nanodots that down-regulate ROS in zebrafish
Source: Royal Society of Chemistry journal article supplement (doi:10.1039/c7tb01114h), 2017-01-01
Supplement: c7tb01114h2.pdf [file c7tb01114h2.pdf]

## Supporting Information

### Ultrahigh-yield Synthesis of N-doped Carbon Nanodots with Down-regulating ROS in Zebrafish

Lei Wang, Baoqiang Li\*, Li Li, Feng Xu, Zheheng Xu, Daqing Wei, Yujie Feng, Yaming Wang, Dechang Jia, Yu Zhou

\*E-mail: libq@hit.edu.cn

### Supplementary Figures

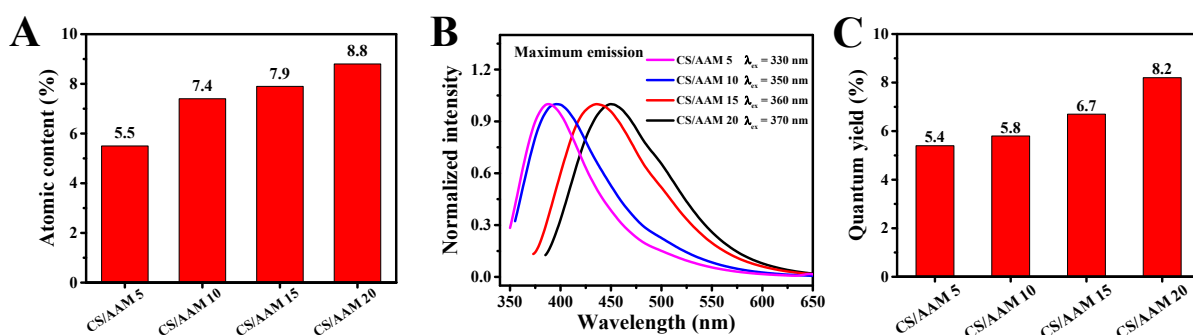

**Figure S1.** The effect of unsaturated amides, carboxylic acids or ester mass ratios (CS+AAM 5, CS/AAM 10, CS/AAM 15, CS/AAM 20) on (A) Nitrogen content (mol %); (B) Maximum emission; (C) Quantum yield of N-doped CNDs.

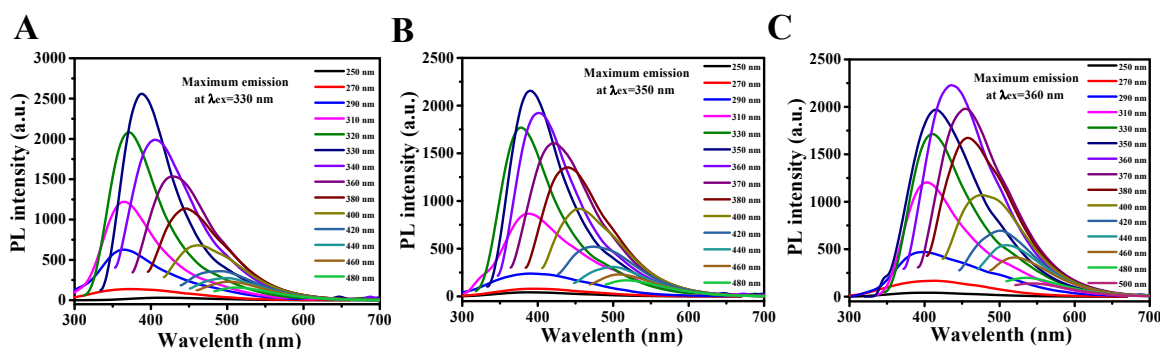

**Figure S2.** Excitation-dependent photoluminescence spectra of other N-doped CNDs (A: CS/AAM 5; B: CS/AAM 10; C: CS/AAM 15).

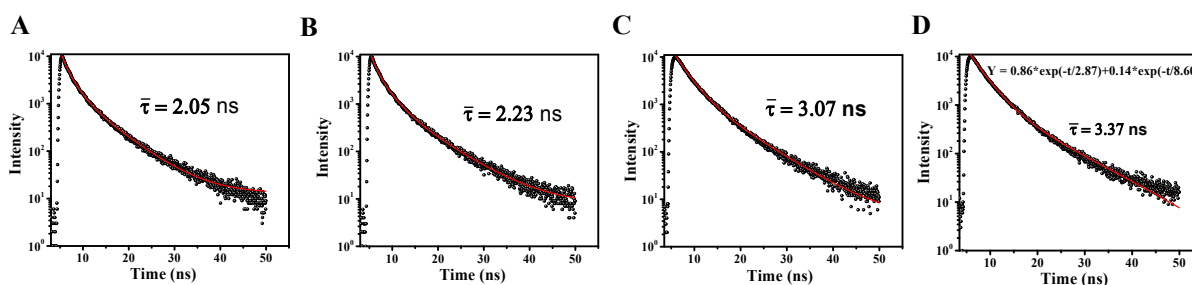

**Figure S3.** Typical time-resolved fluorescence-decay curve of other N-doped CNDs (A: CS/AAM 5; B: CS/AAM 10; C: CS/AAM 15; D: CS/AAM 20).

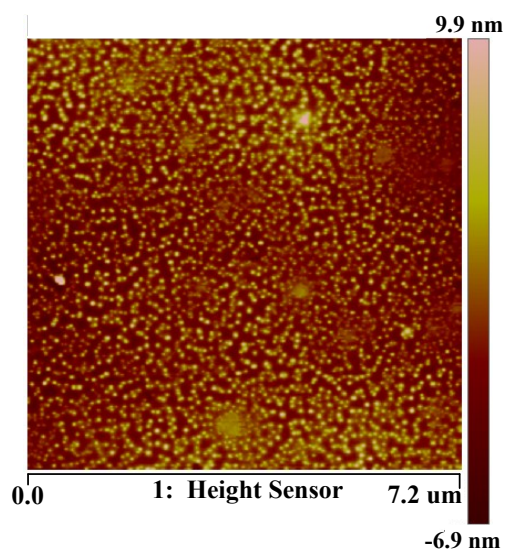

Figure S4. AFM topography image of N-doped CNDs on a silicon substrate

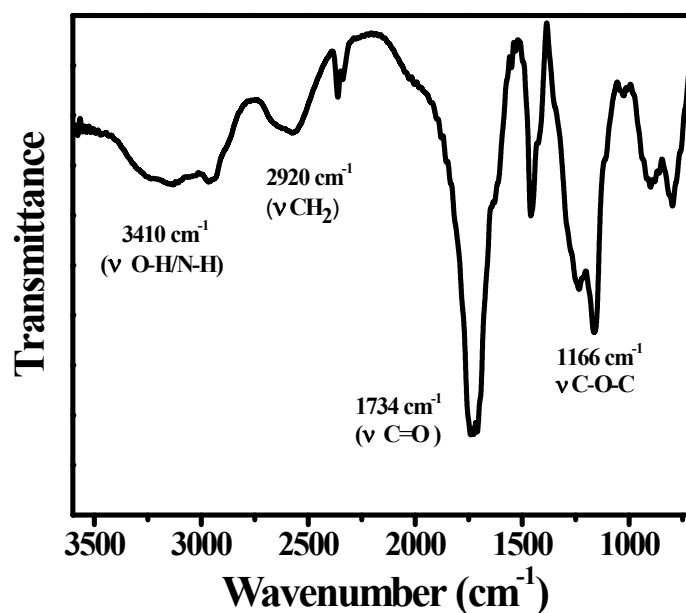

Figure S5. FTIR spectra of N-doped CNDs.

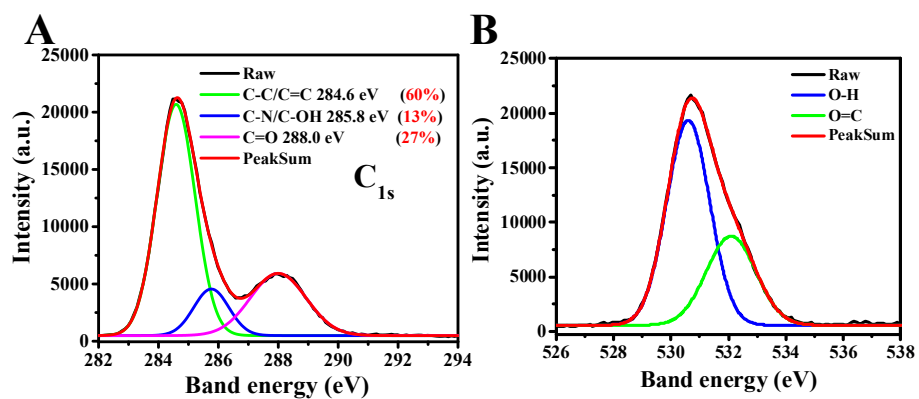

Figure S6. XPS high resolution scans of the C<sub>1s</sub> (A) and O<sub>1s</sub> (B).

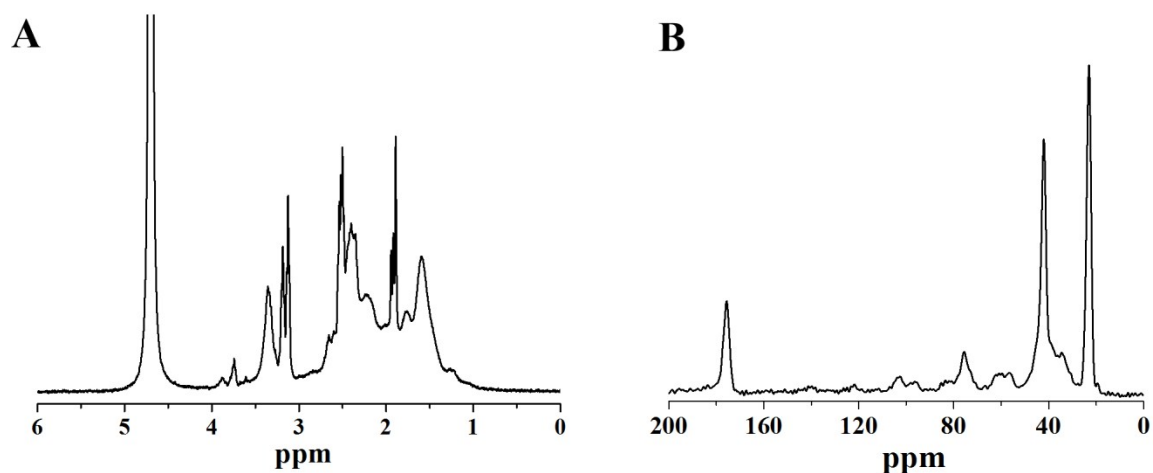

**Figure S7** (A)  $^1\text{H}$ -NMR and (B)  $^{13}\text{C}$ -NMR spectra of the N-doped CNDs

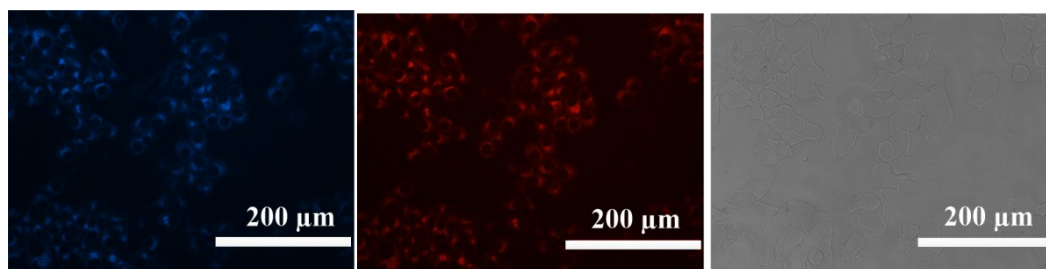

**Figure S8** Fluorescence images of HCT116 cells treated with N-doped CNDs under fluorescence field (365~405 nm, 550~570 nm) and bright field.

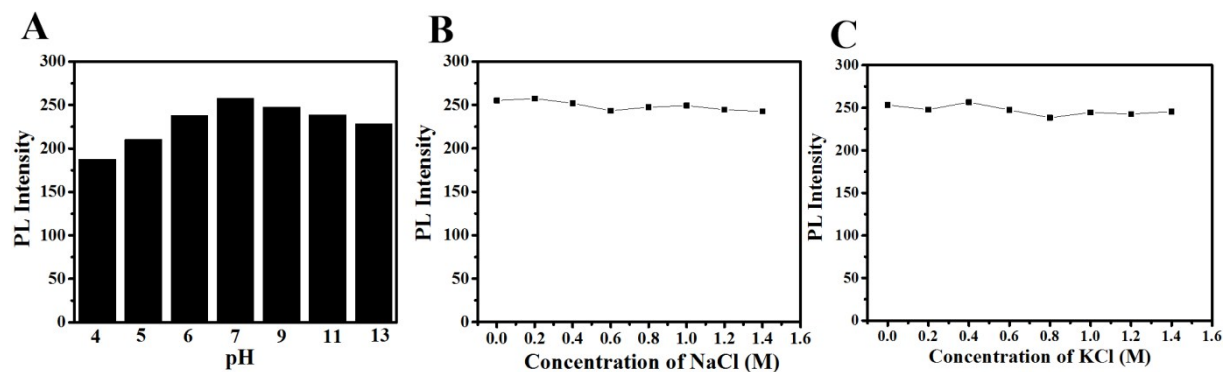

**Figure S9** Effect of pH (A),  $\text{Na}^+$  (B) and  $\text{K}^+$  (C) on the PL intensity of N-doped CNDs.
